# Supplementary material for: The MPI Facial Expression Database — A Validated Database of Emotional and Conversational Facial Expressions
Source: PubMed Central journal article supplement (PMC3305299; doi:10.1371/journal.pone.0032321), 2012-03-15
Supplement: pone.0032321.s002.pdf [file pone.0032321.s002.pdf]

**Table S2: Summary of all facial expressions and their particular background description.**

| Expression                  | Everyday scenario                                                                                                                                           | Expression type            |
|-----------------------------|-------------------------------------------------------------------------------------------------------------------------------------------------------------|----------------------------|
| Agree, considered           | Someone suggests to try something. You hesitate first but then you agree.                                                                                   | subordinate conversational |
| Agree, continue             | During a conversation you signal your partner that you have understood everything and that he can continue.                                                 | subordinate conversational |
| Agree, pure                 | You agree with someone.                                                                                                                                     | conversational             |
| Agree, reluctant            | Someone suggests something. You are really not sure about it, but in the end you agree.                                                                     | subordinate conversational |
| Aha, Lightbulb moment       | Now I get it!                                                                                                                                               | conversational             |
| Anger                       | One of your flat mates has taken your dinner out of the fridge which you were looking forward to eat all day long.                                          | emotional                  |
| Arrogance/superiority       | Only you are the best!                                                                                                                                      | subordinate emotional      |
| Bored                       | Right now you feel bored.                                                                                                                                   | conversational             |
| Annoyed                     | You have to do tons of work which you do not want to do at all. The night before the deadline you realize that you have to work all night long.             | conversational             |
| Confused                    | You lose the way in a foreign city.                                                                                                                         | conversational             |
| Contempt                    | You think of someone you despise.                                                                                                                           | subordinate emotional      |
| Don't care                  | Someone suggests something but you are not interested in it at all.                                                                                         | conversational             |
| Didn't hear                 | Someone talks to you but you cannot understand it because the environment is too loud.                                                                      | conversational             |
| Disagree, pure              | You disagree.                                                                                                                                               | conversational             |
| Disagree, considered        | Someone suggests to try something. You hesitate first and disagree finally.                                                                                 | subordinate conversational |
| Disagree, reluctant         | Someone suggests to try something. You are not up for it and finally disagree.                                                                              | subordinate conversational |
| Disbelief                   | Someone tells you a true story, however, you do not want to believe it.                                                                                     | conversational             |
| Disgust                     | You find moldy food in your fridge after you come home from a journey.                                                                                      | emotional                  |
| Don't know                  | Someone asks you for the name of the Ugandan president.                                                                                                     | conversational             |
| Don't understand            | Someone is explaining something to you, but you do not understand it.                                                                                       | conversational             |
| Embarrassment               | Your professor commends your work in the seminar. You feel embarrassed.                                                                                     | subordinate emotional      |
| Evasive                     | You ate the last piece of chocolate and hide it from the others.                                                                                            | conversational             |
| Fear, "Oh my God!"          | After leaving your flat you realize you forgot to switch off the cooker.                                                                                    | emotional                  |
| Fear, terror                | A monster appears suddenly.                                                                                                                                 | subordinate emotional      |
| Happy, achievement          | You have reached a goal and you are happy to have accomplished it.                                                                                          | subordinate emotional      |
| Happy, laughing             | You are laughing about a joke.                                                                                                                              | emotional                  |
| Happy, satiated             | You are lying on your couch after a delicious dinner.                                                                                                       | subordinate emotional      |
| Happy, Schadenfreude        | Someone whom you don't like slips on a banana peel in front of you.                                                                                         | subordinate emotional      |
| Imagine, negative           | You imagine something unpleasant in your future.                                                                                                            | subordinate conversational |
| Imagine, positive           | You imagine something pleasant in your future.                                                                                                              | subordinate conversational |
| Impressed                   | You observe someone dancing and think: "Wow, that's really good!"                                                                                           | subordinate emotional      |
| Insecurity                  | You use an expensive device at the University and suddenly it stops working. You are not sure if this was your fault.                                       | conversational             |
| Compassion                  | Your best friend tells you that he/she has broken up with his partner.                                                                                      | conversational             |
| Maybe, not convinced        | Someone suggests something but you are not really convinced.                                                                                                | conversational             |
| Pain, felt                  | While doing sports you suddenly have an accident in which you twist one ankle and graze your knee.                                                          | subordinate emotional      |
| Pain, seen                  | You watch a TV transmission of your favourite sport event. Suddenly one player has a serious accident. You can see bones sticking out of the player's body. | subordinate emotional      |
| Annoyed, rolling eyes       | You explain something for the 10th time and your listener still does not get it.                                                                            | conversational             |
| Thinking, considering       | Someone makes a suggestion and you hesitate.                                                                                                                | conversational             |
| Thinking, remember negative | You recall an awkward situation that happened to you in the past.                                                                                           | subordinate conversational |

|                             |                                                                                                                                                                                   |                            |
|-----------------------------|-----------------------------------------------------------------------------------------------------------------------------------------------------------------------------------|----------------------------|
| Thinking, remember neutral  | You think about what you had for breakfast yesterday.                                                                                                                             | conversational             |
| Thinking, remember positive | You recall a pleasant situation that happened to you in the past.                                                                                                                 | subordinate conversational |
| Thinking, problem solving   | You think of how old you will be in 37 months.                                                                                                                                    | conversational             |
| Sad                         | You fail one of your most important exams.                                                                                                                                        | emotional                  |
| Smiling, endearment         | A little girl smiles at you.                                                                                                                                                      | subordinate emotional      |
| Smiling, encouraging        | You encourage somebody by saying: "Cheer up, everything will work!"                                                                                                               | subordinate emotional      |
| Smiling, flirting           | You are flirting.                                                                                                                                                                 | subordinate emotional      |
| Smiling, reluctant          | A friend of you wants to go out this evening. You do not want to go with him/her. She/He tells you that a couple of other friends will also be around whom you want to see again. | subordinate emotional      |
| Smiling, sardonic           | You said a sardonic joke concerning one of your friends.                                                                                                                          | subordinate emotional      |
| Smiling, sad/nostalgia      | You recall a pleasant situation that happened to you in the past and get the feeling that everything was better back then.                                                        | subordinate emotional      |
| Smiling, pride              | You achieved something which someone didn't believe possible.                                                                                                                     | subordinate emotional      |
| Smiling, uncertain          | Something happened and you are not sure if it is positive.                                                                                                                        | subordinate emotional      |
| Winning smile               | The parents of your girlfriend visit you. You open the door and welcome them.                                                                                                     | subordinate emotional      |
| Smiling, "Yeah right!"      | Someone tells you something incredible and you think: "Yeah, as if..."                                                                                                            | subordinate emotional      |
| Tired                       | The only thing you want to do is to lie in the bed after a long working day.                                                                                                      | conversational             |
| doe eyed                    | No everyday description available for this expression                                                                                                                             | conversational             |

This table illustrates all recorded facial expressions and their particular everyday descriptions that can be found in the new facial expression database. The labels of the expressions were chosen such that they best summarize the given free-naming answers of the validation experiment. We, however, do not claim that these are the most accurate labels, but they do give us a good impression of both the categories and the semantics of the recorded facial expressions. Note, that all facial expressions are recorded in low and high intensities and from three different camera perspectives.
